# Supplementary material for: Induced dipole moments in amorphous ZnCdS catalysts facilitate photocatalytic H2 evolution
Source: PubMed Central journal article supplement (PMC10960824; doi:10.1038/s41467-024-47022-z), 2024-03-23
Supplement: 41467_2024_47022_MOESM3_ESM.pdf [file 41467_2024_47022_MOESM3_ESM.pdf]

## **Description of Additional Supplementary Files**

File Name: Supplementary Movie 1

Description: hydrogen evolution of Co-MoS<sub>x</sub>/AZCS under Xe lamp light.

File Name: Supplementary Movie 2

Description: hydrogen evolution of Co-MoS<sub>x</sub>/AZCS under natural sunlight.

File Name: Supplementary Movie 3

Description: a flexible Co-MoS<sub>x</sub>/AZCS film with repeated bending.

File Name: Supplementary Movie 4

Description: hydrogen evolution of a flexible Co-MoS<sub>x</sub>/AZCS film under Xe lamp light.

File Name: Supplementary Movie 5

Description: hydrogen evolution of a flexible Co-MoS<sub>x</sub>/AZCS film under natural sunlight.
